# Supplementary material
Source: HighWire-hosted journal article supplement (https://bmjopen.bmj.com/content/12/9/e063137)
Supplement: inline-supplementary-material-1 [file inline-supplementary-material-1.pdf]

# Systematic review of the National Health Inequalities Strategy

Results of systematic search procedure

|                    |        |
|--------------------|--------|
| Medline via OVID   | 2,542  |
| Embase via OVID    | 2,585  |
| PsycINFO via Ebsco | 6,818  |
|                    |        |
| Total              | 11,945 |

Search was run 18<sup>th</sup> November 2021

No language limits.

Publication date limit from 1999 onwards

Exclusions of publication type: dissertation, book, chapter, editorial, conference abstract

Filters were adapted from

- Prady, S.L., Uphoff, E.P., Power, M. *et al.* Development and validation of a search filter to identify equity-focused studies: reducing the number needed to screen. *BMC Med Res Methodol* **18**, 106 (2018). <https://doi-org/10.1186/s12874-018-0567-x>
- Ayiku L, Levay P, Hudson T, Craven J, Barrett E, Finnegan A and Adams R. The MEDLINE UK filter: development and validation of a geographic search filter to retrieve research about the UK from OVID MEDLINE. *Health Information and Libraries Journal*, 2017 34 (3): 200-216. <https://doi.org/10.1111/hir.12187>

## Medline

Ovid MEDLINE(R) and Epub Ahead of Print, In-Process, In-Data-Review & Other Non-Indexed Citations, Daily and Versions(R) <1946 to November 17, 2021>

1 Residence Characteristics/ or Environment design/ or exp Marital status/ or neighbo?rhood\*.mp. or residential environment\*.mp. or rural\*.mp. or inner?city.mp. or housing instability.mp. or housing insecurity.mp. or housing strain.mp. or housing security.mp. or mortgage problems.mp. or foreclosure.mp. or eviction\*.mp. or housing loss.mp. or home repossession\*.mp. or home ownership.mp. or (repossess\* adj3 hous\*).mp. or (repossess\* adj3 propert\*).mp. or mortgage delinquency.mp. or mortgage arrears.mp. or mortgage debt\*.mp. or overcrowding.mp. or (living adj1 (outside or inside or near\* or adjacent)).mp. or (household adj2 size).mp. or (marital status or marriage status).mp. or (widow\* or cohabit\* or divorce\* or single parent\* or live\* alone).mp.

323423

2 Occupations/ or Unemployment/ or occupations.mp. or unemployment.mp. 62137

- 3 exp Educational status/ or Education/ or Schooling.mp. or educational status.mp. or (education\* adj2 level?).mp. or ((higher or better or worse or less) adj educated).mp. or ((higher or better or worse or less) adj level? of education).mp. 134987
- 4 Social determinants of Health/ or Psychosocial Deprivation/ or Sociological Factors/ or Working Poor/ or Hierarchy, Social/ or disparit\*.mp. or inequalit\*.mp. or inequit\*.mp. or equity.mp. or deprivation.mp. or gini.mp. or concentration index.mp. or Socioeconomic Factors/ or Social Welfare/ or exp Social Class/ or exp Poverty/ or Income/ or Social class\*.mp. or social determinants.mp. or social status.mp. or social position.mp. or social background.mp. or social circumstance\*.mp. or socio-economic.mp. or socioeconomic.mp. or sociodemographic.mp. or socio-demographic.mp. or SES.mp. or disadvantaged.mp. or impoverished.mp. or poverty.mp. or economic level.mp. or assets index.mp. or income\*.mp. 717106
- 5 Social Stigma/ or social capital/ or Social Control, Informal/ or exp Social Support/ or exp Social Environment/ or Trust/ or Social conditions/ or Social isolation/ or Social marginalization/ or Anomie/ or social participation/ or social exclusion.mp. or (social adj (capital or cohes\* or organis\* or organiz\*)).mp. or (community adj3 (cohes\* or participa\*)).mp. or ((neighbourhood or neighborhood) adj cohes\*).mp. or social relationships.mp. or social network\*.mp. or collective efficacy.mp. or civil society.mp. or informal social control.mp. or neighbo\*rhood disorder.mp. or social disorgani?ation.mp. or anomie.mp. or social support.mp. or social participation.mp. or trust.mp. or emotional support.mp. or psychosocial support.mp. or community capital.mp. or neighbo\*rhood cohesion.mp. or social influence.mp. or (soci\*context\* or soci\*-context\*).mp. 303822
- 6 Health Status Disparities/ or Health Services Accessibility/ or Health Equity/ or health\*care disparit\*.mp. or health care disparit\*.mp. or health status disparit\*.mp. or health disparit\*.mp. or health inequalit\*.mp. or health inequit\*.mp. or medically underserved.mp. 135875
- 7 (potential determinants or significant correlates of or (independent correlates or independent association\*) or variables associated with or determinants of or factors associated with or identif\* determinants or (more likely or less likely or just as likely) or risk factors for or (significantly related to or significant predictor) or (also adj2 associated with) or (at increased risk or at decreased risk) or association\* between or (positively associated or negatively associated) or differed by or (were high\* amongst or were low\* amongst) or (inverse relationship with or inversely associated with or inversely related to) or reverse association or differentially affects or evidence of a link between or (significantly adj3 likelihood of) or protective factors for or (differ\* adj2 according to) or (inverse adj2 gradient) or (positive adj2 gradient) or (negative adj2 gradient) or (trends were adj3 across) or (related to adj3 variable\*) or (differences were adj3 explained by) or (significant among or no# significant among)).mp. 2292908
- 8 exp United Kingdom/ 380572
- 9 (national health service\* or nhs\*).ti,ab,in. 231806
- 10 (gb or "g.b." or britain\* or (british\* not "british columbia") or uk or "u.k." or united kingdom\* or (england\* not "new england")).ti,ab,jw,in. 2191349
- 11 (exp africa/ or exp americas/ or exp antarctic regions/ or exp arctic regions/ or exp asia/ or exp australia/ or exp oceania/) not (exp United Kingdom/ or europe/) 3114866
- 13 english.ti. 11204

- 14 (or/8-10,13) not 11 2294562
- 15 (strategy\* or policy or policies or "new labour").ti. or exp \*health plan implementation/ or exp \*program evaluation/ or exp \*government programs/ 150442
- 16 12 and 14 and 15 2910
- 17 limit 16 to yr="1999 -Current" 2607
- 18 editorial.pt. 586919
- 19 17 not 18 2542

### Embase

Embase <1974 to 2021 November 17>

- 1 exp United Kingdom/ 437004
- 2 (national health service\* or nhs\*).ti,ab,in,ad. 402422
- 3 english.ti. 11539
- 4 (gb or "g.b." or britain\* or (british\* not "british columbia") or uk or "u.k." or united kingdom\* or (england\* not "new england")).ti,ab,jx,in,ad. 3346279
- 5 or/1-4 3500080
- 6 (exp "arctic and antarctic"/ or exp oceanic regions/ or exp western hemisphere/ or exp africa/ or exp asia/) not (exp united kingdom/ or europe/) 3186628
- 7 5 not 6 3347135
- 8 \*demography/ or \*environmental planning/ or \*marriage/ or \*divorce/ or \*cohabitation/ or \*widow/ or exp \*"single (marital status)"/ or neighbo?rhood\*.ti,ab. or residential environment\*.ti,ab. or rural\*.ti,ab. or inner?city.ti,ab. or housing instability.ti,ab. or housing insecurity.ti,ab. or housing strain.ti,ab. or housing security.ti,ab. or mortgage problems.ti,ab. or foreclosure.ti,ab. or eviction\*.ti,ab. or housing loss.ti,ab. or home repossession\*.ti,ab. or home ownership.ti,ab. or (repossess\* adj3 hous\*).ti,ab. or (repossess\* adj3 propert\*).ti,ab. or mortgage delinquency.ti,ab. or mortgage arrears.ti,ab. or mortgage debt\*.ti,ab. or overcrowding.ti,ab. or (living adj1 (outside or inside or near\* or adjacent)).ti,ab. or (household adj2 size).ti,ab. or (marital status or marriage status).ti,ab. or (widow\* or cohabit\* or divorce\* or single parent\* or live\* alone).ti,ab. 324196
- 9 exp \*cultural deprivation/ or \*cultural factor/ or \*cultural anthropology/ or \*cultural diversity/ or exp \*migrant/ or \*minority group/ or \*minority health/ or \*prejudice/ or exp \*social discrimination/ or exp \*race relation/ or exp \*ethnic group/ or exp \*ancestry group/ or exp \*refugee/ or minorit\*.ti,ab. or migration background.ti,ab. or racial.ti,ab. or racism.ti,ab. or ethnology.ti,ab. or race.ti,ab. or ethnic\*.ti,ab. or non?English.ti,ab. or language other than.ti,ab. or latino\*.ti,ab. or latina\*.ti,ab. or hispanic\*.ti,ab. or whites.ti,ab. or caucasian\*.ti,ab. or non?white.ti,ab. or Torres Strait Islander.ti,ab. or aboriginal.ti,ab. or native american.ti,ab. or

- inuit.ti,ab. or eskimo.ti,ab. or first nation\*.ti,ab. or indigenous.ti,ab. or english as a second language.ti,ab. or foreign language.ti,ab. 736888
- 10 exp \*employment status/ or \*job characteristics/ or occupations.ti,ab. or unemployment.ti,ab. 31756
- 11 exp \*educational status/ or schooling.ti,ab. or educational status.ti,ab. or (education\* adj2 level?).ti,ab. or ((higher or better or worse or less) adj educated).ti,ab. or ((higher or better or worse or less) adj level? of education).ti,ab. 109594
- 12 \*"social determinants of health"/ or \*social aspect/ or \*working poor/ or exp \*social hierarchy/ or \*socioeconomics/ or disparit\*.ti,ab. or inequalit\*.ti,ab. or inequit\*.ti,ab. or equity.ti,ab. or deprivation.ti,ab. or gini.ti,ab. or concentration index.ti,ab. or \*social welfare/ or \*social class/ or \*poverty/ or \*social status/ or \*social background/ or social class\*.ti,ab. or social determinants.ti,ab. or social status.ti,ab. or social position.ti,ab. 337621
- 13 (social background or social circumstance\* or socio-economic or socioeconomic or sociodemographic or socio-demographic or SES or disadvantaged or impoverished or poverty or economic level or assets index or income\*).ti,ab. 454622
- 14 exp \*social isolation/ or \*social capital/ or \*social stigma/ or \*social support/ or \*social environment/ or \*trust/ or exp \*social exclusion/ or \*anomie/ or \*social participation/ or social exclusion.ti,ab. or (social adj (capital or cohes\* or organis\* or organiz\*).ti,ab. or (community adj3 (cohes\* or participa\*).ti,ab. or ((neighbourhood or neighborhood) adj cohes\*).ti,ab. or social relationships.ti,ab. or social network\*.ti,ab. or collective efficacy.ti,ab. or civil society.ti,ab. or informal social control.ti,ab. or neighbo\*rhood disorder.ti,ab. or ocial disorgani?ation.ti,ab. or anomie.ti,ab. or social support.ti,ab. or social participation.ti,ab. or trust.ti,ab. or emotional support.ti,ab. or psychosocial support.ti,ab. or community capital.ti,ab. or neighbo\*rhood cohesion.ti,ab. or social influence.ti,ab. or (soci\*context\* or soci\*-context\*).ti,ab. 233663
- 15 \*health disparity/ or \*health equity/ or \*health care access/ or health\*care disparit\*.ti,ab. or health care disparit\*.ti,ab. or health status disparit\*.ti,ab. or health disparit\*.ti,ab. or health inequalit\*.ti,ab. or health inequit\*.ti,ab. or medically underserved.ti,ab. 47837
- 16 (strategy\* or policy or policies or "new labour").ti. or exp \*health program/ or exp \*health care planning/ or exp \*health care policy/ or exp \*program evaluation/ 258767
- 17 8 or 10 or 11 or 12 or 13 or 14 or 15 1219357
- 18 7 and 16 and 173281
- 19 limit 18 to yr="1999 -Current" 2887
- 20 (books or chapter or conference abstract or editorial).pt. 5004392
- 21 19 not 20 2585

## PsycINFO

Interface - EBSCOhost Research Databases

Search Screen - Basic Search

Database - APA PsycInfo

| #   | Query                                                                                                                                                                                                                                                                                                                                                                                                                                                                                                                                                                                                                                                                                                                                                                                                                                                                                                                                                                                                                                                                                                                        | Results |
|-----|------------------------------------------------------------------------------------------------------------------------------------------------------------------------------------------------------------------------------------------------------------------------------------------------------------------------------------------------------------------------------------------------------------------------------------------------------------------------------------------------------------------------------------------------------------------------------------------------------------------------------------------------------------------------------------------------------------------------------------------------------------------------------------------------------------------------------------------------------------------------------------------------------------------------------------------------------------------------------------------------------------------------------------------------------------------------------------------------------------------------------|---------|
| S25 | s22 NOT s23                                                                                                                                                                                                                                                                                                                                                                                                                                                                                                                                                                                                                                                                                                                                                                                                                                                                                                                                                                                                                                                                                                                  | 6,818   |
| S23 | PZ dissertation OR PZ book OR PZ chapter OR PZ editorial                                                                                                                                                                                                                                                                                                                                                                                                                                                                                                                                                                                                                                                                                                                                                                                                                                                                                                                                                                                                                                                                     | 968,350 |
| S22 | S18 AND S19 AND S20 Limiters - Publication Year: 1999-2022                                                                                                                                                                                                                                                                                                                                                                                                                                                                                                                                                                                                                                                                                                                                                                                                                                                                                                                                                                                                                                                                   | 7,649   |
| S21 | S18 AND S19 AND S20                                                                                                                                                                                                                                                                                                                                                                                                                                                                                                                                                                                                                                                                                                                                                                                                                                                                                                                                                                                                                                                                                                          | 8,044   |
| S20 | TI( strategy* or policy or policies or "new labour") or AB ( strategy* or policy or policies or "new labour")                                                                                                                                                                                                                                                                                                                                                                                                                                                                                                                                                                                                                                                                                                                                                                                                                                                                                                                                                                                                                | 278,491 |
| S19 | S5 OR S7 OR S9 OR S11 OR S12 OR S13                                                                                                                                                                                                                                                                                                                                                                                                                                                                                                                                                                                                                                                                                                                                                                                                                                                                                                                                                                                                                                                                                          | 611,076 |
| S18 | S1 OR S2                                                                                                                                                                                                                                                                                                                                                                                                                                                                                                                                                                                                                                                                                                                                                                                                                                                                                                                                                                                                                                                                                                                     | 439,723 |
| S13 | TI ("health*care disparit*" or "health status disparit*" or "health disparit*" or "health inequalit*" or "health inequit*" or "medically underserved") or AB ("health*care disparit*" or "health status disparit*" or "health disparit*" or "health inequalit*" or "health inequit*" or "medically underserved")                                                                                                                                                                                                                                                                                                                                                                                                                                                                                                                                                                                                                                                                                                                                                                                                             | Display |
| S12 | TI (social exclusion or (social n1 (capital or cohes* or organis* or organiz*)) or (community n3 (cohes* or participa*)) or ((neighbourhood or neighborhood) n1 cohes*) or social relationships or social network* or collective efficacy or civil society or informal social control or neighbo*rhood disorder or social disorgani?ation or anomie or social support or social participation or trust or emotional support or psychosocial support or community capital or neighbo*rhood cohesion or social influence or (soci*context* or soci*-context*)) or AB (social exclusion or (social n1 (capital or cohes* or organis* or organiz*)) or (community n3 (cohes* or participa*)) or ((neighbourhood or neighborhood) n1 cohes*) or social relationships or social network* or collective efficacy or civil society or informal social control or neighbo*rhood disorder or social disorgani?ation or anomie or social support or social participation or trust or emotional support or psychosocial support or community capital or neighbo*rhood cohesion or social influence or (soci*context* or soci*-context*)) | Display |
| S11 | TI (disparit* or inequalit* or inequit* or equity or deprivation or gini or "concentration index" or "Social class*" or "social determinants" or "social status" or "social position" or "social background" or "social circumstance*" or socio-economic or socioeconomic or sociodemographic or socio-demographic or SES or disadvantaged or impoverished or poverty or "economic level" or "assets index" or income*) or AB (disparit* or inequalit* or inequit* or equity or deprivation or gini or "concentration index" or "Social class*" or "social determinants" or "social status" or "social position" or "social background" or "social circumstance*" or socio-economic or socioeconomic or                                                                                                                                                                                                                                                                                                                                                                                                                      | Display |

|    |                                                                                                                                                                                                                                                                                                                                                                                                                                                                                                                                                                                                                                                                                                                                                                                                                                                                                                                                                                                                                                                                                                                                                                                    |         |
|----|------------------------------------------------------------------------------------------------------------------------------------------------------------------------------------------------------------------------------------------------------------------------------------------------------------------------------------------------------------------------------------------------------------------------------------------------------------------------------------------------------------------------------------------------------------------------------------------------------------------------------------------------------------------------------------------------------------------------------------------------------------------------------------------------------------------------------------------------------------------------------------------------------------------------------------------------------------------------------------------------------------------------------------------------------------------------------------------------------------------------------------------------------------------------------------|---------|
|    | sociodemographic or socio-demographic or SES or disadvantaged or impoverished or poverty or "economic level" or "assets index" or income*)                                                                                                                                                                                                                                                                                                                                                                                                                                                                                                                                                                                                                                                                                                                                                                                                                                                                                                                                                                                                                                         |         |
| S9 | TI (Schooling or educational status or (education* n2 level*) or ((higher or better or worse or less) n1 educated) or ((higher or better or worse or less) n1 level* of education) or AB (Schooling or educational status or (education* n2 level*) or ((higher or better or worse or less) n1 educated) or ((higher or better or worse or less) n1 level* of education)                                                                                                                                                                                                                                                                                                                                                                                                                                                                                                                                                                                                                                                                                                                                                                                                           | Display |
| S7 | TI (occupations or unemployment) or AB (occupations or unemployment)                                                                                                                                                                                                                                                                                                                                                                                                                                                                                                                                                                                                                                                                                                                                                                                                                                                                                                                                                                                                                                                                                                               | Display |
| S5 | TI (neighbo?rhood* or residential environment* or inner?city or housing instability or housing insecurity or housing strain or housing security or mortgage problems or foreclosure or eviction* or housing loss or home repossession* or home ownership or (repossess* n3 hous*) or (repossess* n3 propert*) or mortgage delinquency or mortgage arrears or mortgage debt* or overcrowding or (living n1 (outside or inside or near* or adjacent)) or (household n2 size) or (marital status or marriage status) or (widow* or cohabit* or divorce* or single parent* or live* alone)) or AB (neighbo?rhood* or residential environment* or inner?city or housing instability or housing insecurity or housing strain or housing security or mortgage problems or foreclosure or eviction* or housing loss or home repossession* or home ownership or (repossess* n3 hous*) or (repossess* n3 propert*) or mortgage delinquency or mortgage arrears or mortgage debt* or overcrowding or (living n1 (outside or inside or near* or adjacent)) or (household n2 size) or (marital status or marriage status) or (widow* or cohabit* or divorce* or single parent* or live* alone)) | Display |
| S2 | TI ( ( gb or "g.b." or britain* or (british* not "british columbia") or uk or "u.k." or united kingdom* or (england* not "new england") ) OR AB ( (gb or "g.b." or britain* or (british* not "british columbia") or uk or "u.k." or united kingdom* or (england* not "new england") or ) OR AF ( (gb or "g.b." or britain* or (british* not "british columbia") or uk or "u.k." or united kingdom* or (england* not "new england") ) )                                                                                                                                                                                                                                                                                                                                                                                                                                                                                                                                                                                                                                                                                                                                             | 434,944 |
| S1 | TI ( national health service* or nhs ) OR AB ( national health service* or nhs ) OR AF ( national health service* or nhs )                                                                                                                                                                                                                                                                                                                                                                                                                                                                                                                                                                                                                                                                                                                                                                                                                                                                                                                                                                                                                                                         | Display |
